# Supplementary material for: Controlled human malaria infection by intramuscular and direct venous inoculation of cryopreserved Plasmodium falciparum sporozoites in malaria-naïve volunteers: effect of injection volume and dose on infectivity rates
Source: Springer Nature journal article supplement (doi:10.1186/s12936-015-0817-x), 2015-08-06

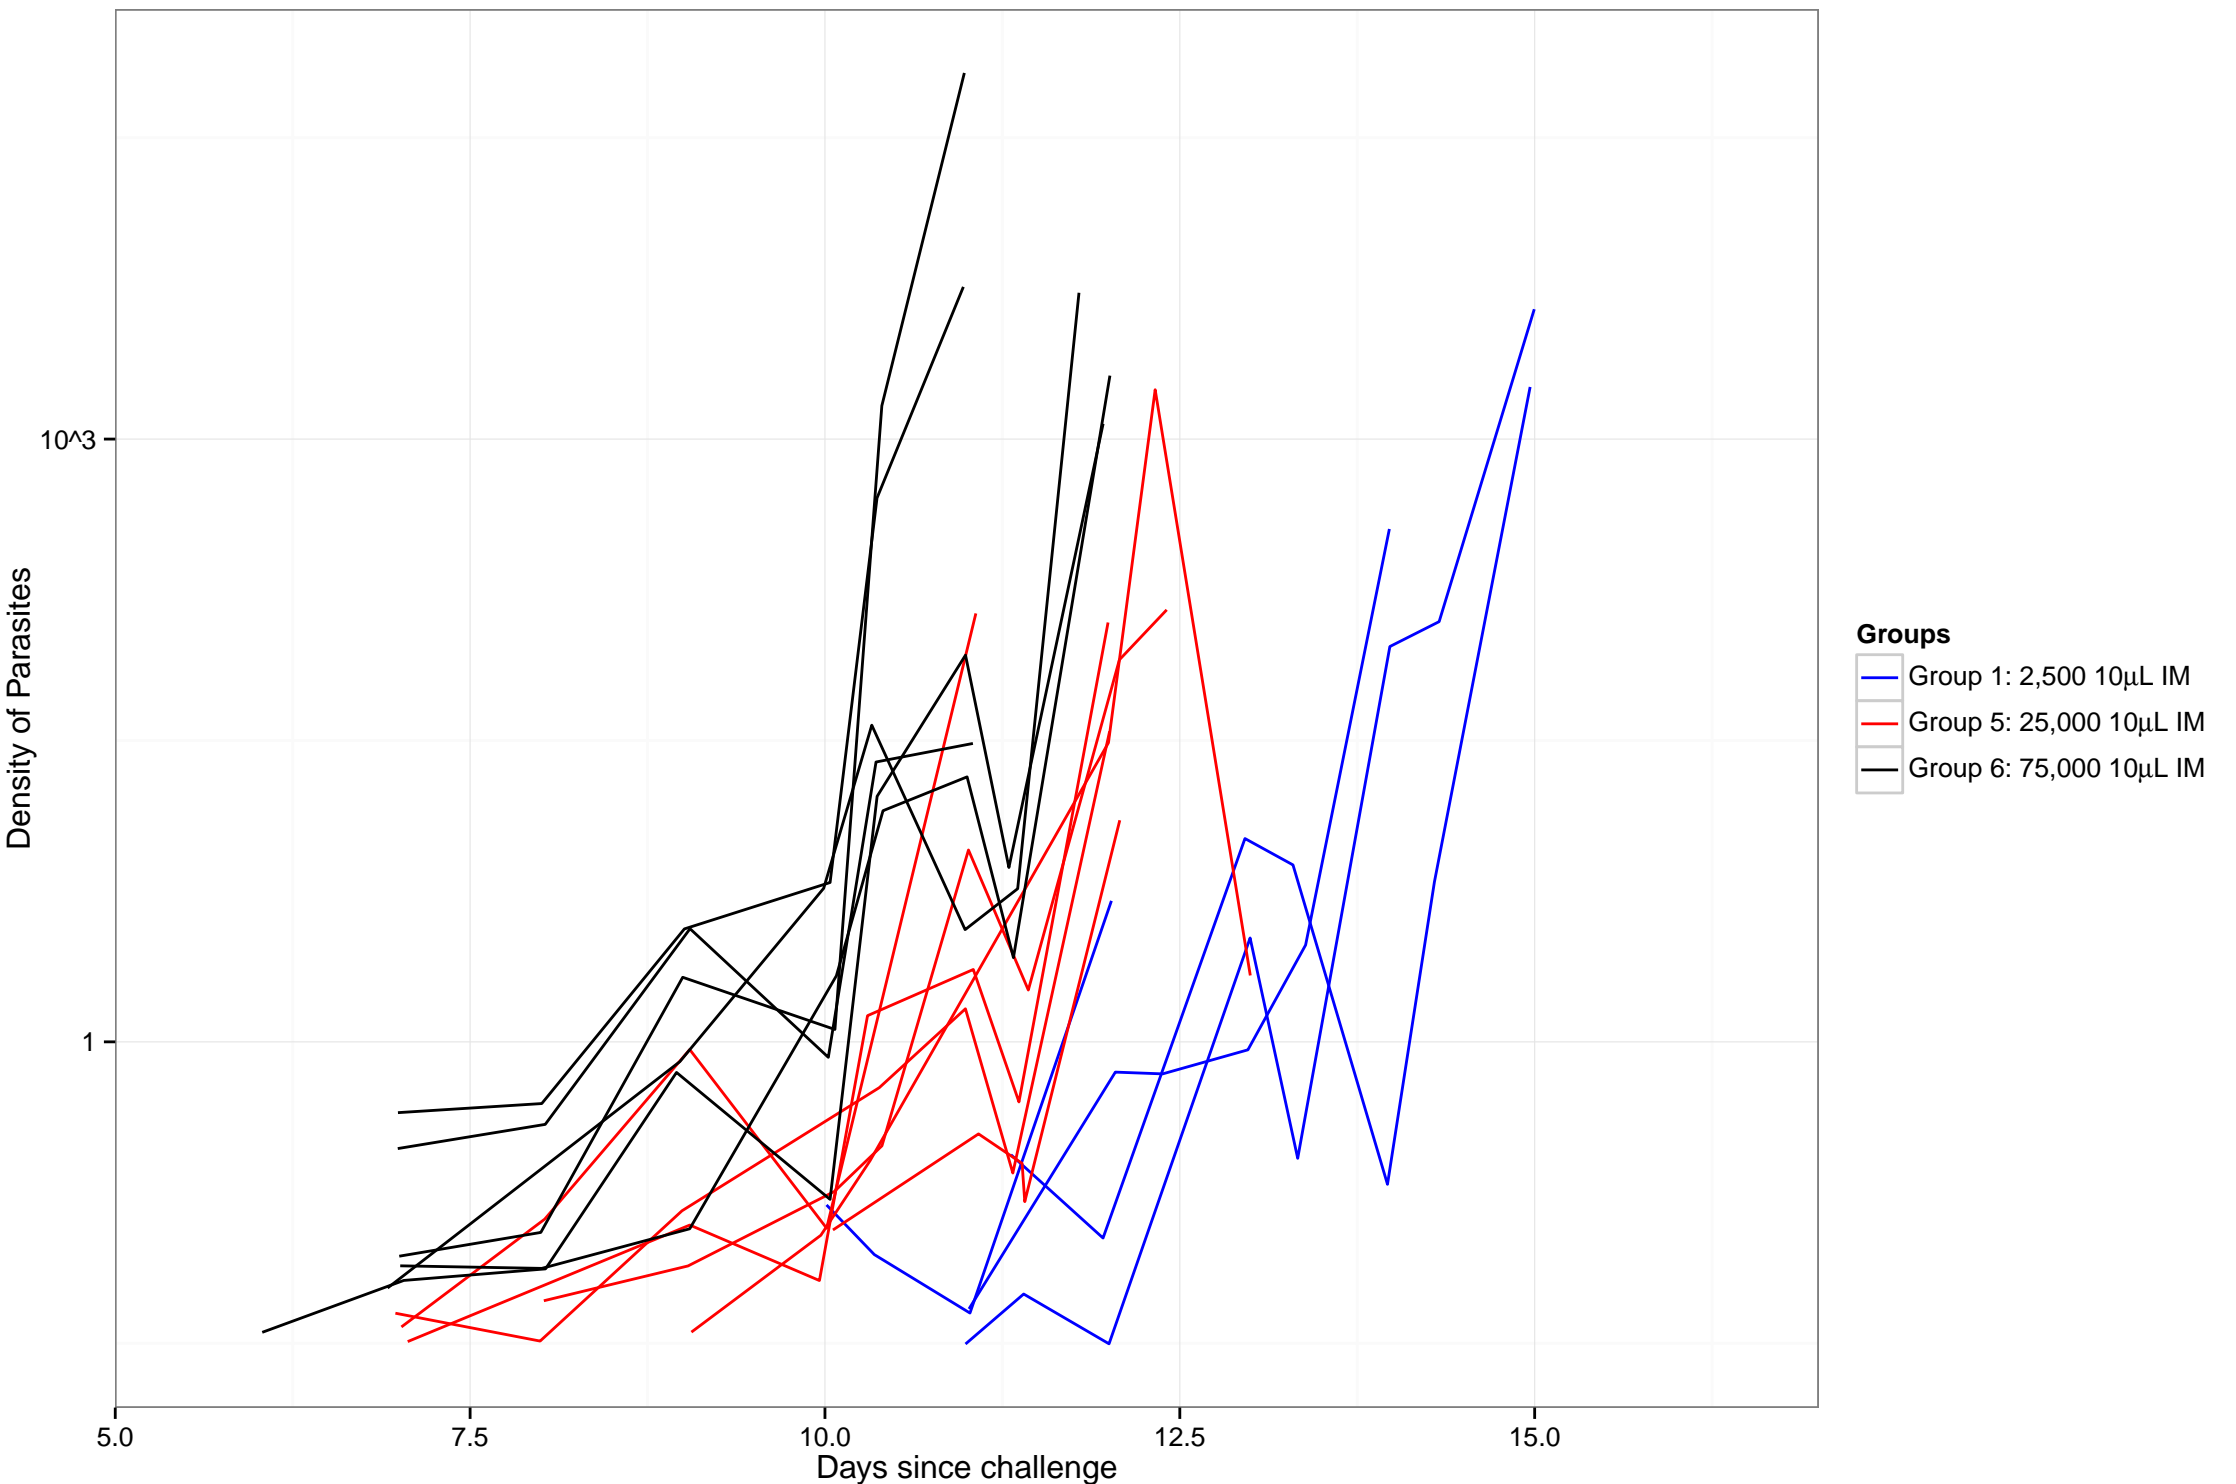

Supplement: MOESM6 [file 9761506]
